# Supplementary material for: A beneficial tumor microenvironment in oropharyngeal squamous cell carcinoma is characterized by a high T cell and low IL-17+ cell frequency
Source: Cancer Immunol Immunother. 2016 Feb 22;65(4):393–403. doi: 10.1007/s00262-016-1805-x (PMC4826411; doi:10.1007/s00262-016-1805-x)
Supplement: Supplementary file 1 — Supplementary material 1 (PDF 347 kb) [file 262_2016_1805_MOESM1_ESM.pdf]

**Supplementary Figure 1.** Quantification of tumor infiltrating cells

**a**

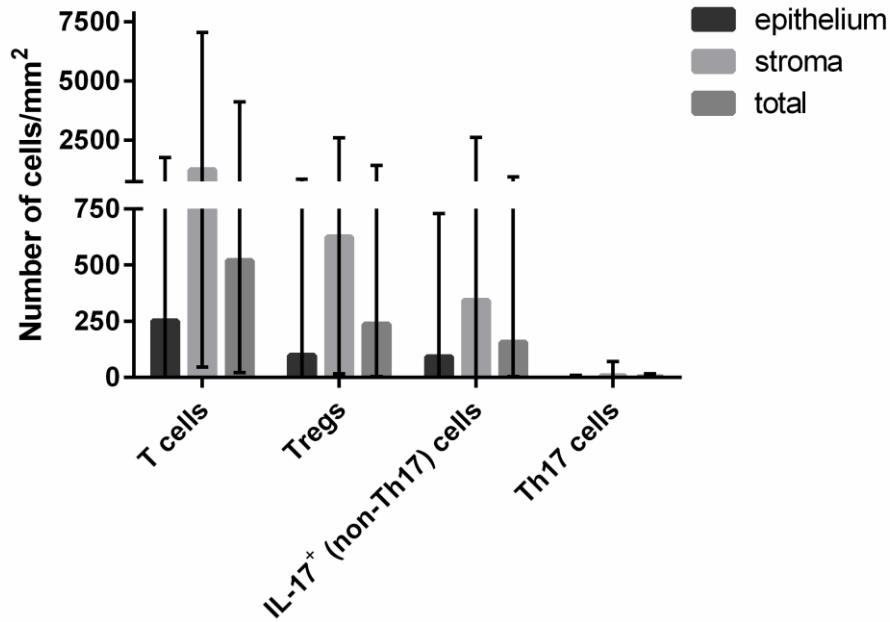

**b**

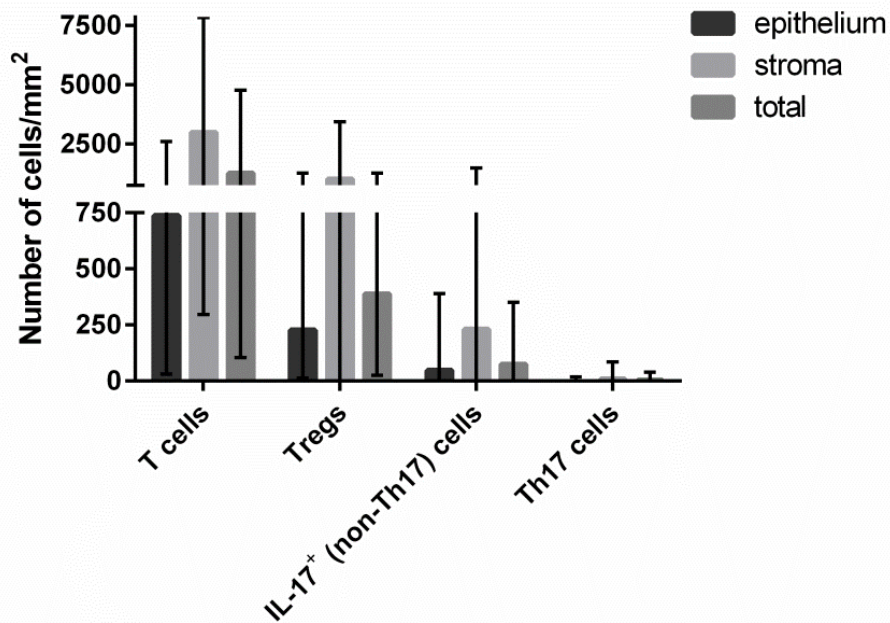

The mean and range of the number of CD3<sup>+</sup> T cells, FoxP3<sup>+</sup>CD3<sup>+</sup> Tregs, CD3<sup>+</sup>IL-17<sup>+</sup> cells and CD3<sup>+</sup>IL-17<sup>+</sup> Th17 cells infiltrating in the tumor epithelium, tumor stroma and combined total area per mm<sup>2</sup> is shown in HPV-negative tumors (**a**, n=99) and HPV-positive tumors (**b**, n=63).

**Supplementary Figure 2.** Decreased intraepithelial T-cell frequency in HPV-positive OPSCC of heavy compared to never smokers

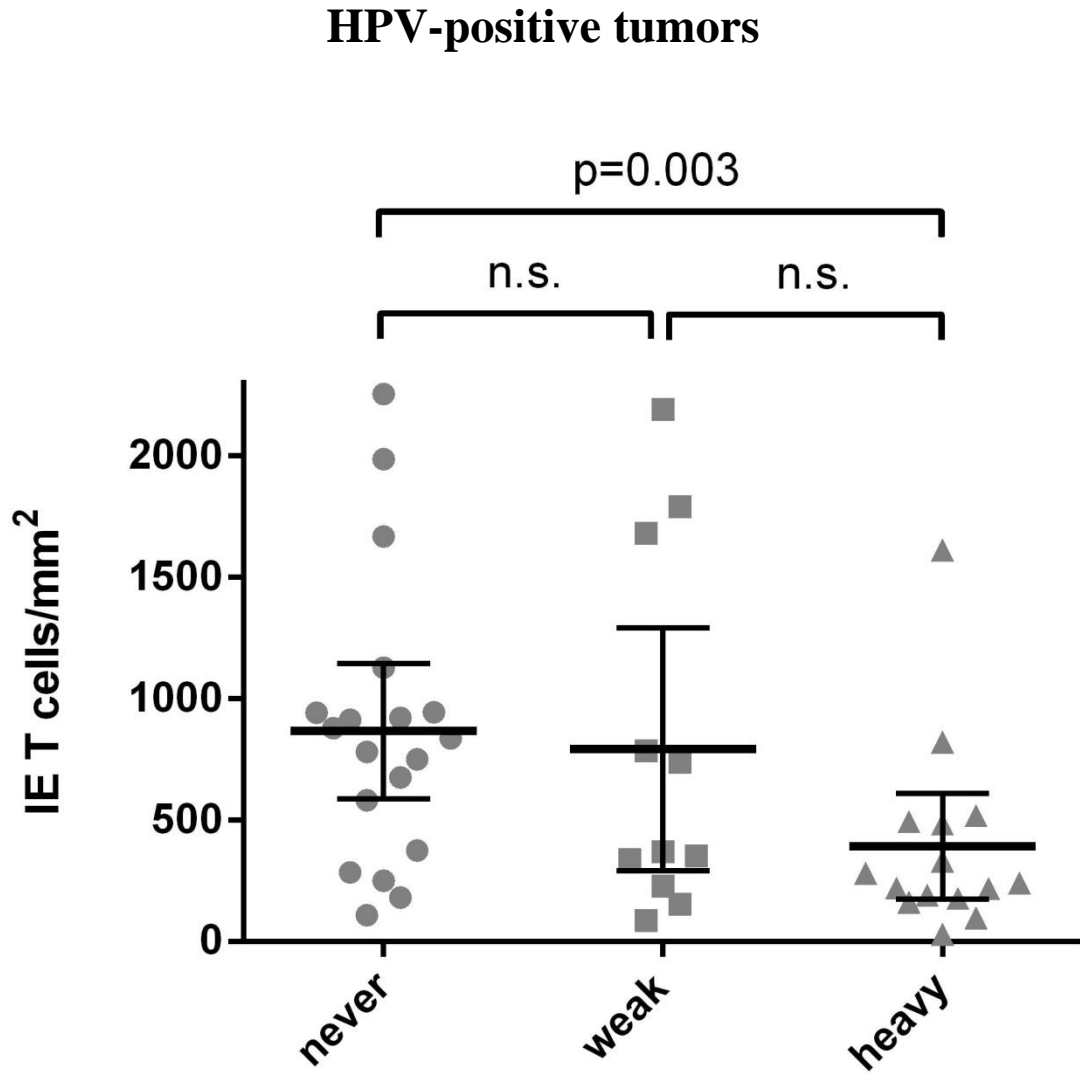

The number of total CD3<sup>+</sup> T cells/mm<sup>2</sup> tumor epithelium in HPV-positive tumors is shown for never, weak (1-24 packyears) and heavy smokers (>24 packyears). The bars indicate the mean and 95% confidence interval; n.s. = not significant.

**Supplementary Table 1.** Number of T cells, Tregs and IL-17<sup>+</sup> cells present in squamous oropharyngeal carcinoma

|                            | Location   | Total T cells      |        | Tregs            |        | IL-17 <sup>+</sup><br>(non-Th17) cells |        | Th17 cells      |        | Total T cells/Tregs |        |
|----------------------------|------------|--------------------|--------|------------------|--------|----------------------------------------|--------|-----------------|--------|---------------------|--------|
|                            |            | Mean<br>(range)    | Median | Mean<br>(range)  | Median | Mean<br>(range)                        | Median | Mean<br>(range) | Median | Mean<br>(range)     | Median |
| HPV-<br>negative<br>tumors | Epithelium | 251<br>(0-1767)    | 151    | 98<br>(0-863)    | 49     | 92<br>(0-730)                          | 41     | 1<br>(0-9)      | 0      | 4<br>(1-37)         | 2      |
|                            | Stroma     | 1237<br>(47-7042)  | 971    | 624<br>(16-2596) | 520    | 343<br>(0-2613)                        | 237    | 6<br>(0-70)     | 0      | 2<br>(1-8)          | 2      |
|                            | Total      | 519<br>(21-4113)   | 362    | 237<br>(4-1438)  | 193    | 156<br>(3-956)                         | 99     | 2<br>(0-17)     | 0      | 2<br>(1-8)          | 2      |
| HPV-<br>positive<br>tumors | Epithelium | 738<br>(30-2596)   | 545    | 226<br>(12-1272) | 150    | 47<br>(0-389)                          | 14     | 1<br>(0-17)     | 0      | 6<br>(1-84)         | 3      |
|                            | Stroma     | 2985<br>(295-7831) | 2633   | 1017<br>(0-3437) | 972    | 229<br>(0-1479)                        | 121    | 7<br>(0-85)     | 0      | 4<br>(1-35)         | 3      |
|                            | Total      | 1251<br>(104-4775) | 1005   | 387<br>(24-1272) | 335    | 73<br>(0-351)                          | 39     | 2<br>(0-38)     | 0      | 5<br>(1-63)         | 3      |

The mean, minimum, maximum and median number of total CD3<sup>+</sup> cells, FoxP3<sup>+</sup>CD3<sup>+</sup> Tregs, CD3<sup>+</sup>IL-17<sup>+</sup> cells and CD3<sup>+</sup>IL-17<sup>+</sup> Th17 cells observed infiltrating in the tumor epithelium, tumor stroma and combined total area per mm<sup>2</sup> is indicated for HPV-negative and HPV-positive tumors.

**Supplementary Table 2.** Effect of 6 different types of T cell infiltrations on disease-free survival regarding HPV status

|                                                    | High intraepithelial T cell frequency |                | High total T cell frequency |                | High total Treg frequency |                | High total nonTreg T cell frequency |                | High intraepithelial nonTreg T cell frequency |                | High total IL-17 <sup>+</sup> cell frequency |                |
|----------------------------------------------------|---------------------------------------|----------------|-----------------------------|----------------|---------------------------|----------------|-------------------------------------|----------------|-----------------------------------------------|----------------|----------------------------------------------|----------------|
| <b>Univariate Hazard Ratio</b>                     | <i>HR (95%CI)</i>                     | <i>p-value</i> | <i>HR (95%CI)</i>           | <i>p-value</i> | <i>HR (95%CI)</i>         | <i>p-value</i> | <i>HR (95%CI)</i>                   | <i>p-value</i> | <i>HR (95%CI)</i>                             | <i>p-value</i> | <i>HR (95%CI)</i>                            | <i>p-value</i> |
| HPV negative (p16 <sup>-</sup> )                   | 1.46<br>(0.73-2.93)                   | 0.282          | 1.11<br>(0.58-2.12)         | 0.751          | 1.65<br>(0.81-3.36)       | 0.165          | 1.62<br>(0.81-3.26)                 | 0.174          | 1.15<br>(0.89-1.50)                           | 0.292          | 0.96<br>(0.51-1.82)                          | 0.912          |
| HPV positive (p16 <sup>+</sup> /PCR <sup>+</sup> ) | 0.22<br>(0.08-0.64)                   | <b>0.006</b>   | 0.28<br>(0.10-0.82)         | <b>0.021</b>   | 0.21<br>(0.07-0.64)       | <b>0.006</b>   | 0.27<br>(0.09-0.78)                 | <b>0.015</b>   | 0.35<br>(0.12-1.03)                           | 0.056          | 0.50<br>(0.17-1.51)                          | 0.220          |
| <b>Multivariate Hazard Ratio*</b>                  | <i>HR (95%CI)</i>                     | <i>p-value</i> | <i>HR (95%CI)</i>           | <i>p-value</i> | <i>HR (95%CI)</i>         | <i>p-value</i> | <i>HR (95%CI)</i>                   | <i>p-value</i> | <i>HR (95%CI)</i>                             | <i>p-value</i> | <i>HR (95%CI)</i>                            | <i>p-value</i> |
| HPV negative (p16 <sup>-</sup> )                   | 1.52<br>(0.74-3.18)                   | 0.256          | 1.13<br>(0.57-2.21)         | 0.721          | 1.77<br>(0.83-3.74)       | 0.134          | 1.66<br>(0.81-3.41)                 | 0.168          | 1.16<br>(0.84-1.88)                           | 0.258          | 1.09<br>(0.54-2.18)                          | 0.806          |
| HPV positive (p16 <sup>+</sup> /PCR <sup>+</sup> ) | 0.25<br>(0.07-0.95)                   | <b>0.043</b>   | 0.34<br>(0.10-1.13)         | 0.080          | 0.28<br>(0.08-1.02)       | 0.054          | 0.40<br>(0.12-1.32)                 | 0.135          | 1.18<br>(0.24-5.97)                           | 0.835          | 0.53<br>(0.17-1.69)                          | 0.284          |

\*Adjusted for comorbidity, prior tumor and smoking status using Cox proportional hazards regression analysis. This analysis was performed 6 times, entering a different type of T cell infiltration each time, but adjusting for the same variables (comorbidity, prior tumor and smoking status).

HR= hazard ratio, 95%CI = 95% confidence interval. 'High'= upper 3 qrt vs lowest qrt.
